# Supplementary material for: Influence of Pressure on Structure, Stability and Ionic Conductivity of Lithium Argyrodite Solid Electrolytes
Source: Research Square preprint supplement (doi:10.21203/rs.3.rs-8404265/v1), 2026-01-14
Supplement: Supplementary file 1 [file 48e347962c3029e447bc246a.docx]

**––Supporting Information––**

**Influence of Pressure on Structure, Stability and Ionic Conductivity of Lithium Argyrodite Solid Electrolytes**

Jemma L. Cox1, Jack M. Hemingway1, James A. Quirk1, Erli Lu2 and James A. Dawson1,*

*1Chemistry – School of Natural and Environmental Sciences, Newcastle University, Newcastle upon Tyne, UK*

*2School of Chemistry, University of Birmingham, Birmingham, UK*

Li6PS5Cl

Li6PS5Br

0 GPa

1 GPa

2 GPa

3 GPa

4 GPa

10 GPa

**Figure S1.** Projected electronic density of states for Li6PS5X (X = Cl or Br) with 0% site exchange as a function of pressure. The valence band maximum is set to 0 eV.

**Figure S2.** Pressure dependence of Li-ion activation energy (*Ea*) for Li6PS5Cl0.5Br0.5, Li6PS5Cl0.75Br0.25 and Li6PS5Cl0.25Br0.75 with 0% and 75% S2⁻/X⁻site exchange.


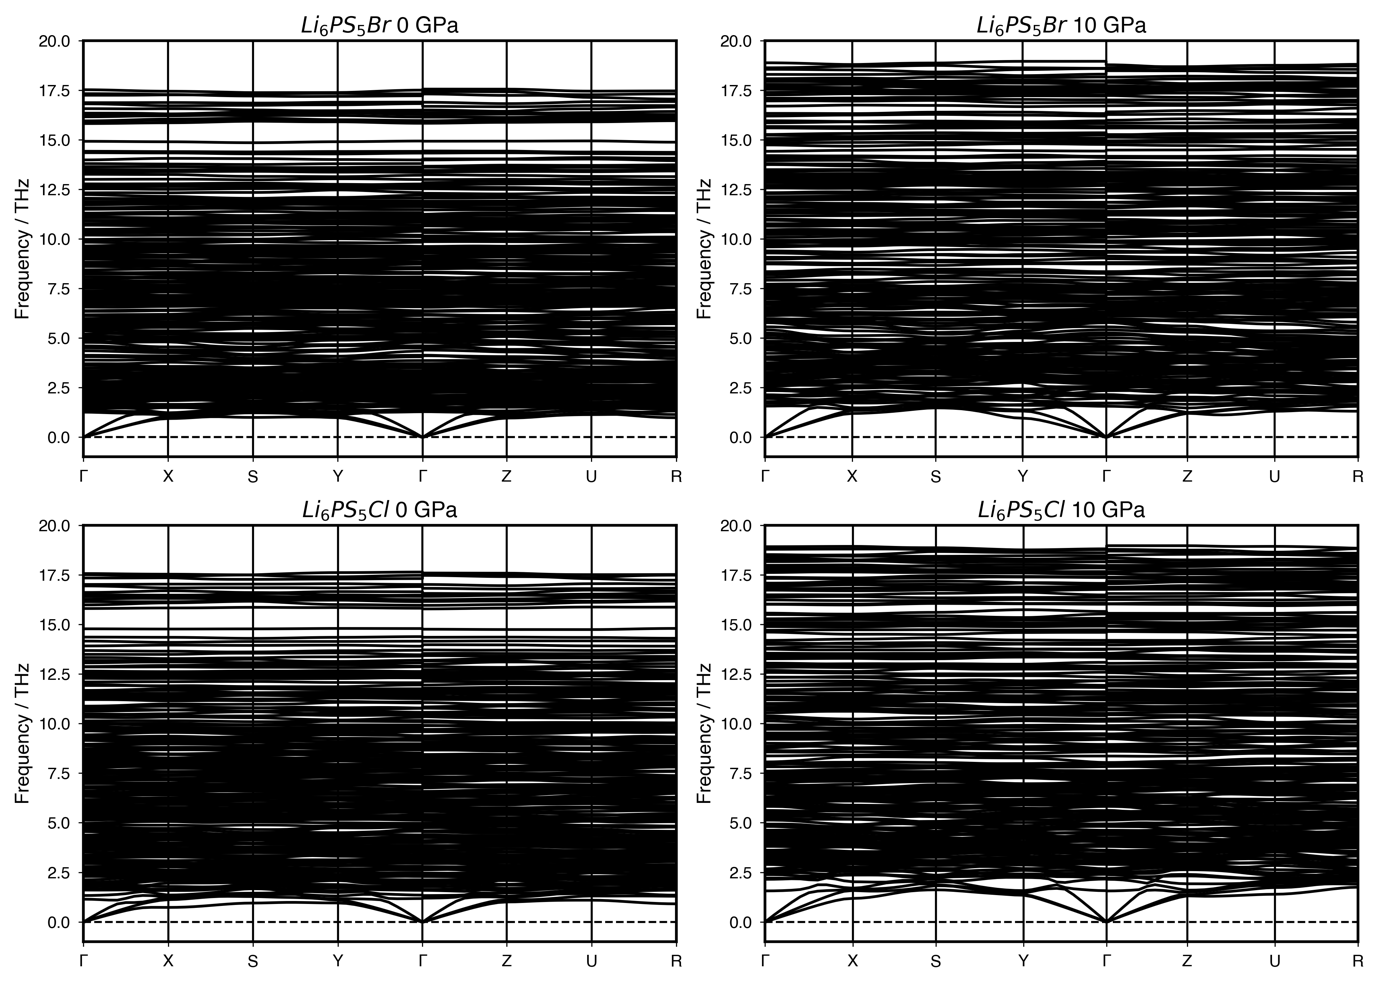


**Figure S3.** Phonon dispersion spectra of Li6PS5X (X = Cl and Br) at 0 and 10 GPa.
